# Supplementary material
Source: PubMed Central journal article supplement (PMC8488780)
Supplement: ONCO-26-845-s002.pdf [file ONCO-26-845-s002.pdf]

Supplemental Tables for:

The prognostic impact of KRAS G12C mutation in patients with metastatic colorectal cancer: a multicenter retrospective observational study

Daisuke Kotani et al.

1 Supplementary Table 1. Patients characteristics of each *KRAS* exon2 mutation subtype.

| Factor                     | <i>KRAS</i> exon2 mutation subtypes |                  |                   |                  |                   |                   | <i>P</i> -value |
|----------------------------|-------------------------------------|------------------|-------------------|------------------|-------------------|-------------------|-----------------|
|                            | G12A<br>(n = 31)                    | G12C<br>(n = 45) | G12D<br>(n = 261) | G12S<br>(n = 36) | G12V<br>(n = 151) | G13D<br>(n = 160) |                 |
| <b>Age, median (range)</b> | 64 (41–82)                          | 65 (31–79)       | 65 (30–83)        | 61 (51–82)       | 65 (31–88)        | 65 (24–85)        | 0.786           |
| <b>Age, n (%)</b>          |                                     |                  |                   |                  |                   |                   | 0.638           |
| ≥ 65                       | 14 (45.2)                           | 24 (53.3)        | 134 (51.3)        | 15 (41.7)        | 80 (53.0)         | 90 (56.2)         |                 |
| <b>Gender, n (%)</b>       |                                     |                  |                   |                  |                   |                   | 0.883           |
| Female                     | 13 (41.9)                           | 24 (53.3)        | 114 (43.7)        | 15 (41.7)        | 68 (45.0)         | 73 (45.6)         |                 |
| Male                       | 18 (58.1)                           | 21 (46.7)        | 147 (56.3)        | 21 (58.3)        | 83 (55.0)         | 87 (54.4)         |                 |
| <b>ECOG PS, n (%)</b>      |                                     |                  |                   |                  |                   |                   | 0.659           |
| 0                          | 21 (67.7)                           | 31 (68.9)        | 200 (76.6)        | 28 (77.8)        | 113 (74.8)        | 122 (76.2)        |                 |

|   |          |          |           |          |           |           |
|---|----------|----------|-----------|----------|-----------|-----------|
| 1 | 8 (25.8) | 9 (20.0) | 51 (19.5) | 8 (22.2) | 30 (19.9) | 31 (19.4) |
| 2 | 2 (6.5)  | 5 (11.1) | 10 (3.8)  | 0 (0.0)  | 8 (5.3)   | 7 (4.4)   |

**Primary tumor**

0.579

**Location, n (%)**

|         |           |           |            |           |            |            |
|---------|-----------|-----------|------------|-----------|------------|------------|
| right   | 11 (35.5) | 16 (35.6) | 92 (35.2)  | 10 (27.8) | 38 (25.2)  | 58 (36.2)  |
| left    | 20 (64.5) | 29 (64.4) | 169 (64.8) | 26 (72.2) | 112 (74.2) | 101 (63.1) |
| missing | 0 (0.0)   | 0 (0.0)   | 0 (0.0)    | 0 (0.0)   | 1 (0.6)    | 1 (0.7)    |

**Surgery on**

0.738

**Primary tumor, n (%)**

|     |           |           |            |           |           |           |
|-----|-----------|-----------|------------|-----------|-----------|-----------|
| Yes | 14 (45.2) | 21 (46.7) | 95 (36.4)  | 13 (36.1) | 54 (35.8) | 61 (38.1) |
| No  | 17 (54.8) | 24 (53.3) | 166 (63.6) | 23 (63.9) | 97 (64.2) | 99 (61.9) |

**Time of First**

0.154

**metastasis, n (%)**

|              |          |           |           |           |           |           |
|--------------|----------|-----------|-----------|-----------|-----------|-----------|
| Metachronous | 7 (22.6) | 10 (22.2) | 98 (37.5) | 10 (27.8) | 59 (39.1) | 55 (34.4) |
|--------------|----------|-----------|-----------|-----------|-----------|-----------|

|                                |            |            |            |            |            |            |       |
|--------------------------------|------------|------------|------------|------------|------------|------------|-------|
| Synchronous                    | 24 (77.4)  | 35 (77.8)  | 163 (62.5) | 26 (72.2)  | 92 (60.9)  | 105 (65.6) |       |
| <b>Histology, n (%)</b>        |            |            |            |            |            |            | 0.679 |
| well/mod                       | 24 (77.4)  | 40 (88.9)  | 230 (88.1) | 33 (91.7)  | 139 (92.1) | 143 (89.4) |       |
| por/muc                        | 6 (19.4)   | 4 (8.9)    | 28 (10.7)  | 3 (8.3)    | 10 (6.6)   | 14 (8.8)   |       |
| missing                        | 1 (3.2)    | 1 (2.2)    | 3 (1.1)    | 0 (0.0)    | 2 (1.3)    | 3 (1.9)    |       |
| <b>Serum LDH IU/L,</b>         | 227        | 221        | 208        | 212        | 205        | 217        |       |
| <b>median (range)</b>          | (123–2139) | (140–1459) | (75–4340)  | (145–3193) | (98–2873)  | (122–3450) | 0.704 |
| <b>GPS, n (%)</b>              |            |            |            |            |            |            | 0.100 |
| 0                              | 16 (51.6)  | 27 (60.0)  | 174 (66.7) | 29 (80.6)  | 96 (63.6)  | 106 (66.2) |       |
| 1                              | 7 (22.6)   | 10 (22.2)  | 46 (17.6)  | 3 (8.3)    | 34 (22.5)  | 19 (11.9)  |       |
| 2                              | 8 (25.8)   | 7 (15.6)   | 35 (13.4)  | 4 (11.1)   | 20 (13.2)  | 34 (21.2)  |       |
| missing                        | 0 (0.0)    | 1 (2.2)    | 6 (2.3)    | 0 (0.0)    | 1 (0.7)    | 1 (0.6)    |       |
| <b>Metastatic sites, n (%)</b> |            |            |            |            |            |            |       |
| Liver                          | 20 (64.5)  | 30 (66.7)  | 155 (59.4) | 17 (47.2)  | 83 (55.0)  | 92 (57.5)  | 0.488 |

|                                |           |           |            |           |           |           |       |
|--------------------------------|-----------|-----------|------------|-----------|-----------|-----------|-------|
| Lung                           | 15 (48.4) | 18 (40.0) | 102 (39.1) | 16 (44.4) | 74 (49.0) | 62 (38.8) | 0.377 |
| Peritoneal dissemination       | 10 (32.3) | 16 (35.6) | 57 (21.8)  | 6 (16.7)  | 36 (23.8) | 39 (24.4) | 0.287 |
| <b>Number of</b>               |           |           |            |           |           |           |       |
| <b>Metastatic sites, n (%)</b> |           |           |            |           |           |           | 0.067 |
| 1                              | 10 (32.3) | 18 (40.0) | 143 (54.8) | 18 (50.0) | 71 (47.0) | 70 (43.8) |       |
| ≥ 2                            | 21 (67.7) | 27 (60.0) | 118 (45.2) | 18 (50.0) | 80 (53.0) | 90 (56.2) |       |

1

2 *P*-values were calculated using the  $\chi^2$  test. Abbreviations: *KRAS*, Kirsten rat sarcoma; ECOG PS, Eastern Cooperative Oncology Group  
3 performance status; well, well-differentiated; mod, moderately differentiated; por, poorly differentiated; muc, mucinous adenocarcinoma; LDH,  
4 Lactate dehydrogenase; GPS, Glasgow prognostic score

5

6

7

8

9

10

11

1  
2  
3  
4

**Supplementary Table 2. Patients' characteristics of each *KRAS* exon2 mutation subtype with doublet or triplet regimen.**

|                            | <i>KRAS</i> G12C mutations<br>(n = 43) | <i>KRAS</i> non-G12C mutations<br>(n = 619) | <i>P</i> -value |
|----------------------------|----------------------------------------|---------------------------------------------|-----------------|
| <b>Age, median (range)</b> | 65 (31–79)                             | 65 (24–88)                                  | 0.550           |
| <b>Age, n (%)</b>          |                                        |                                             | 0.753           |
| ≥ 65                       | 23 (53.5)                              | 310 (50.1)                                  |                 |
| <b>Gender, n (%)</b>       |                                        |                                             | 0.115           |
| Female                     | 24 (55.8)                              | 268 (43.3)                                  |                 |
| Male                       | 19 (44.2)                              | 351 (56.7)                                  |                 |
| <b>ECOG PS, n (%)</b>      |                                        |                                             | 0.109           |
| 0                          | 30 (69.8)                              | 481 (77.7)                                  |                 |
| 1                          | 9 (20.9)                               | 118 (19.1)                                  |                 |

---

|                                        |           |            |       |
|----------------------------------------|-----------|------------|-------|
| 2                                      | 4 (9.3)   | 20 (3.2)   |       |
| <b>Primary tumor location, n (%)</b>   |           |            | 0.664 |
| right                                  | 16 (37.2) | 203 (32.8) |       |
| left                                   | 27 (62.8) | 414 (66.9) |       |
| missing                                | 0 (0.0)   | 2 (0.3)    |       |
| <b>Surgery on primary tumor, n (%)</b> |           |            | 0.333 |
| Yes                                    | 19 (44.2) | 228 (36.8) |       |
| No                                     | 24 (55.8) | 391 (63.2) |       |
| <b>Time of First metastasis, n (%)</b> |           |            | 0.136 |
| Metachronous                           | 10 (23.3) | 217 (35.1) |       |
| Synchronous                            | 33 (76.7) | 402 (64.9) |       |
| <b>Histology, n (%)</b>                |           |            | 0.685 |
| well/mod                               | 38 (88.4) | 551 (89.0) |       |
| por/muc                                | 4 (9.3)   | 60 (9.7)   |       |
| missing                                | 1 (2.3)   | 8 (1.3)    |       |

---

---

|                                           |                |               |       |
|-------------------------------------------|----------------|---------------|-------|
| <b>Metastatic sites, n (%)</b>            |                |               |       |
| Liver                                     | 29 (67.4)      | 357 (57.7)    | 0.263 |
| Lung                                      | 18 (41.9)      | 262 (42.3)    | 1.000 |
| Peritoneal dissemination                  | 14 (32.6)      | 141 (22.8)    | 0.190 |
| <b>Number of metastatic sites, n (%)</b>  |                |               | 0.270 |
| 1                                         | 17 (39.5)      | 304 (49.1)    |       |
| ≥ 2                                       | 26 (60.5)      | 315 (50.9)    |       |
| <b>Serum LDH IU/L, median (range)</b>     | 221 (140–1459) | 207 (75–4340) | 0.459 |
| <b>GPS, n (%)</b>                         |                |               | 0.654 |
| 0                                         | 26 (60.5)      | 410 (66.2)    |       |
| 1                                         | 10 (23.3)      | 103 (16.6)    |       |
| 2                                         | 6 (13.9)       | 97 (15.7)     |       |
| missing                                   | 1 (2.3)        | 9 (1.5)       |       |
| <b>First-line backbone regimen, n (%)</b> |                |               | 0.247 |
| Doublet*                                  | 43 (100.0)     | 591 (95.5)    |       |

---

|                                      |           |            |              |
|--------------------------------------|-----------|------------|--------------|
| Triplet**                            | 0 (0.0)   | 28 (4.5)   |              |
| <b>First-line bevacizumab, n (%)</b> |           |            | <b>0.535</b> |
| Yes                                  | 9 (20.9)  | 107 (17.3) |              |
| No                                   | 34 (79.1) | 512 (82.7) |              |

1

2 *P*-values were calculated using Fisher's exact probability test for categorical variables.

3 Abbreviations: *KRAS*, Kirsten rat sarcoma; ECOG PS, Eastern Cooperative Oncology Group performance status; well, well-differentiated; mod,  
 4 moderately differentiated; por, poorly differentiated; muc, mucinous adenocarcinoma; LDH, Lactate dehydrogenase; GPS, Glasgow prognostic  
 5 score

6 Doublet\* indicates oxaliplatin based regimens (FOLFOX, CAPOX and SOX) or irinotecan-based regimens (FOLFIRI, IRIS [SIRB], CAPIRI).

7 Triplet\*\* indicates FOLFOXIRI.
